# Supplementary material
Source: HighWire-hosted journal article supplement (http://openres.ersjournals.com/highwire/filestream/10947/field_highwire_adjunct_files/1/ERJOR-00020-2015_supplement.pdf)
Supplement: ERJOR-00020-2015_supplement.pdf [file ERJOR-00020-2015_supplement.pdf]

## ONLINE SUPPLEMENTARY MATERIAL

### ACUTE MYOCARDIAL INFARCTION *VERSUS* OTHER CARDIOVASCULAR EVENTS IN COMMUNITY-ACQUIRED PNEUMONIA

#### MATERIAL AND METHODS

##### Data collection

Charts of all patients were abstracted using a standardized form. Information included demographic characteristics, comorbidities, electrocardiogram, clinical, radiological and laboratory results on admission and during hospitalization, severity of the disease on admission, including the pneumonia severity index, CURB-65 score, admission to intensive care unit, and ventilatory and blood pressure support on admission [1,2].

##### Study definitions

*Community-acquired pneumonia* was defined as the presence of a new pulmonary infiltrate seen on radiograph or computed tomography scan of the chest within 48 hours after hospitalization *plus* at least one of the following: a) new or increased cough with/without sputum production; b) fever (documented temperature -rectal or oral-  $\geq 38.3$ ) or hypothermia (documented temperature -rectal or oral-  $<36^{\circ}$  C); c) evidence of systemic inflammation (such as abnormal white blood cell count -either leukocytosis ( $>10,000/\text{cm}^3$ ) or leukopenia ( $<4,000/\text{cm}^3$ ) - or C-reactive protein or procalcitonin values above the local upper limit.

*Severe sepsis* was defined by the presence of at least one of the following signs of organ hypoperfusion or organ dysfunction: 1) sepsis-induced hypotension; 2) lactate greater than the upper limits of normal laboratory results; 3) urine output  $<0.5$  mL/kg/hour for  $>2$  hours, despite adequate fluid resuscitation; 4) creatinine  $>2.0$  mg/dL; 5) bilirubin  $>2$  mg/dL; 6) platelet count  $<100,000$ ; 7) coagulopathy (INR  $>1.5$ ) [3].

*Septic shock* was defined as sepsis associated with sepsis-induced hypotension despite adequate fluid resuscitation [3].

*Acute respiratory failure* was defined as the presence of at least one of the following on admission: 1) partial pressure of oxygen in arterial blood ( $\text{PaO}_2$ )  $< 60$  mmHg; 2) ratio of  $\text{PaO}_2$  and fraction of inspired oxygen ( $\text{PaO}_2/\text{FiO}_2$ )  $< 250$ ; 3) oxygen saturation  $< 90\%$ ; 4) respiratory acidosis, and 5) ventilatory support. Respiratory acidosis was considered when a pH value on admission of less than 7.35 was identified with a partial pressure of carbon dioxide in arterial blood ( $\text{PaCO}_2$ )  $\geq 45$  mmHg [4].

*Clinical failure.* During the first 6 hours after admission to the Emergency Room (ER) / ward patient was stabilized and his “baseline status” was defined. The presence of clinical failure was evaluated after stabilization of the patient in the ER and after her/his admission in the department, and during hospitalization. Clinical failure was identified by the presence of at least one of the following in comparison to baseline or the previous day: 1) acute pulmonary deterioration with the need of either non-invasive or invasive mechanical ventilation (defined as: use of accessory muscles or paradoxical movement during breathing *plus* respiratory rate  $> 30$  b/m *plus*  $\text{PaO}_2/\text{FiO}_2$  ratio  $< 250$  or a reduction of  $\geq 30\%$  of the basal  $\text{PaO}_2/\text{FiO}_2$  ratio value or acute respiratory acidosis or increase of 20% of  $\text{PaCO}_2$  value if prior  $\text{PaCO}_2$  value was  $\geq 40$  mmHg) or leading to either non-invasive or invasive mechanical ventilation; 2) acute hemodynamic deterioration with the need of aggressive fluid resuscitation (over 40 ml/kg of

colloids or crystalloids in 4-6 hours), vasopressors or invasive procedures (e.g.: pericardial drainage, electrical cardioversion); 3) in-hospital death [5].

*Chronic renal failure* was defined in a subject having a creatinine clearance  $<60$  mL/min/1.73 m<sup>2</sup> for at least 12 months prior hospitalization.

*Coronary artery disease* was defined as 1)  $>50\%$  reduction in luminal diameter of at least one of the three major epicardial coronary arteries, 2) a documented myocardial infarction (MI), or 3) a perfusion abnormality on nuclear imaging in  $\geq 1$  coronary artery territory, before hospitalization.

*Essential Arterial hypertension* was defined in a subject having a systolic blood pressure  $\geq 140$  mm Hg, or a diastolic blood pressure  $\geq 90$  mm Hg, or taking anti-hypertensive medications for at least 12 months prior hospitalization.

*Hyperlipidemia* was defined in a subject having a total cholesterol level above 200 mg/dl and/or taking antihyperlipidemic drugs for at least 12 months prior hospitalization.

*Congestive heart failure* was defined in a subject in NYHA class II or higher, based on symptoms, signs and objective abnormality on echocardiography, for at least 12 months prior hospitalization [6].

*Neurological disease* was defined in a subject with a history of a central nervous system malignancy, stroke, head injury, or degenerative neurological disorder diagnosed before hospitalization.

*Liver disease* was defined in a subject having either cirrhosis or chronic active hepatitis, or primary biliary cirrhosis, with any of the following sequelae: ascites, oesophageal varices, portal hypertension, or active hepatic encephalopathy, diagnosed before hospitalization.

*Thrombocytosis* was defined as platelet counts  $> 400,000/L$  on hospital admission

## **Microbiological examination**

Pleural puncture, tracheobronchial aspirates, and bronchoalveolar lavage fluid, when available, were also collected and cultured. The etiology was considered definite if one of the following criteria was met: positive blood culture in the absence of an apparent extrapulmonary focus; positive bacterial culture of pleural fluid; positive urinary antigen for *Legionella pneumophila* (Binax Now, Trinity Biotech, Bray, Ireland); positive urinary antigen for *Streptococcus pneumoniae* (Binax Now, Emergo Europe, The Netherlands); a bacterial yield in cultures of valid sputum (> 25 polymorphonuclear cells and < 10 epithelial cells per power field, total magnification x 100) of at least  $10^6$  CFU/mL, tracheobronchial aspirates of at least  $10^5$  CFU/mL, bronchoalveolar lavage fluid of at least  $10^4$  CFU/mL and protected specimen brush cultures of at least  $10^3$  CFU/mL; seroconversion (a 4-fold rise in IgG titers for *C. pneumoniae* [1:512], *L. pneumophila* or a rise in IgM titers for *C. pneumoniae* [1:32] and *M. pneumoniae* [any titer]) occurred. When two or more microbiological causes were present, the patient was considered to have a polymicrobial infection. Patients for whom no microbiological tests were performed, and patients with negative microbiological results, were considered to have disease of an unknown etiology.

## **Definitions of cardiovascular events**

Criteria for *acute myocardial infarction (AMI)* were defined as: detection of rise and/or fall of troponin with at least one value above the 99<sup>th</sup> percentile of the upper reference limit together with evidence of myocardial ischemia with at least one of the following: 1) symptoms of ischemia; 2) electrocardiogram (EKG) changes indicative of new ischemia (new ST-T changes or new left bundle branch block); 3) development of pathologic Q waves in the EKG;

or 4) imaging evidence of new loss of viable myocardium or new regional wall motion abnormality [7].

Diagnosis of *acute cardiogenic pulmonary edema* was established on the basis of medical history (acute severe dyspnea) and typical physical findings (widespread pulmonary rales), with chest radiography, performed within 6 hours from the event, confirming pulmonary vascular congestion.

Diagnosis of a *new arrhythmia* was established if any of the following was present as new onset: atrial flutter, atrial fibrillation, junctional supraventricular, or ventricular tachycardia.

Diagnosis of an *acute worsening of a long-term arrhythmia* was established if atrial fibrillation was switched to atrial flutter or in the presence of a switch of classes in Lown classification or in the presence of hemodynamic impairment (clinical features of shock and/or systolic blood pressure < 90 mmHg).

*Cerebrovascular accident* was defined as the development of an embolic, thrombotic, or hemorrhagic vascular accident or stroke with motor, sensory, or cognitive dysfunction that persisted for  $\geq 24$  hours, or transient ischemic attack, or reversible ischemic neurologic deficit if confirmed by a neurologist after computed tomography or magnetic resonance imaging scanning [8].

*Pulmonary embolism* was defined as a chest computed tomography evidence of a thromboembolus occluding the pulmonary trunk or one or both main pulmonary arteries consistent with an acute onset of new or worsening shortness of breath or chest pain without another obvious etiology.

All of the enrolled patients were evaluated on admission and every day during hospitalization to identify those undergoing CVE. If a patient was diagnosed on admission to the hospital as having both CAP and a CVE, the latter was defined to be on hospital admission. Each case of cardiovascular event was presented and discussed to a clinical review committee in each

center, composed of at least three physicians, one of whom was a cardiologist. Electrocardiogram and Troponin T or I were performed for the enrolled patients on hospital admission, and at every moment when clinicians had a clinical suspicion of the presence of a cardiovascular event. Troponin T or I determinations were performed with 3 set (every 6 hours) during the first 24 hours after hospital admission and if a suspicion of AMI was present during the hospital course. Chest radiograph was performed during hospital course if a suspicion of ACPE was present. Computed tomography (CT) of the chest was performed on admission and every time during the hospital course if a suspicion of pulmonary embolism was present. Head CT was performed on admission and every time during the hospital course if a suspicion of CVA was present.

## **REFERENCES**

1. Fine MJ, Auble TE, Yealy DM, Hanusa BH, Weissfeld LA, Singer DE, Coley CM, Marrie TJ, Kapoor WN. A prediction rule to identify low-risk patients with community-acquired pneumonia. *N Engl J Med* 1997; 336: 243-250.
2. Lim WS, van der Eerden MM, Laing R, Boersma WG, Karalus N, Town GI, Lewis SA, Macfarlane JT. Defining community acquired pneumonia severity on presentation to hospital: an international derivation and validation study. *Thorax* 2003; 58: 377-382.
3. Dellinger RP, Levy MM, Carlet JM, Bion J, Parker MM, Jaeschke R, Reinhart K, Angus DC, Brun-Buisson C, Beale R, Calandra T, Dhainaut JF, Gerlach H, Harvey M, Marini JJ, Marshall J, Ranieri M, Ramsay G, Sevransky J, Thompson BT, Townsend S, Vender JS, Zimmerman JL, Vincent JL; International Surviving Sepsis Campaign Guidelines Committee; American Association of Critical-Care Nurses; American

College of Chest Physicians; American College of Emergency Physicians; Canadian Critical Care Society; European Society of Clinical Microbiology and Infectious Diseases; European Society of Intensive Care Medicine; European Respiratory Society; International Sepsis Forum; Japanese Association for Acute Medicine; Japanese Society of Intensive Care Medicine; Society of Critical Care Medicine; Society of Hospital Medicine; Surgical Infection Society; World Federation of Societies of Intensive and Critical Care Medicine. Surviving Sepsis Campaign: international guidelines for management of severe sepsis and septic shock: 2008. *Crit Care Med* 2008; 36: 296-327.

4. Aliberti S, Brambilla AM, Chalmers JD, Cilloniz C, Ramirez J, Bignamini A, Prina E, Polverino E, Tarsia P, Pesci A, Torres A, Blasi F, Cosentini R. Phenotyping community-acquired pneumonia according to the presence of acute respiratory failure and severe sepsis. *Respir Res* 2014; 15: 27.
5. Aliberti S, Amir A, Peyrani P, Mirsaeidi M, Allen M, Moffett BK, Myers J, Shaib F, Cirino M, Bordon J, Blasi F, Ramirez JA. Incidence, etiology, timing and risk factors for clinical failure in hospitalized patients with community-acquired pneumonia. *Chest* 2008; 134: 955-962.
6. Dickstein K, Cohen-Solal A, Filippatos G, McMurray JJ, Ponikowski P, Poole-Wilson PA, Strömberg A, van Veldhuisen DJ, Atar D, Hoes AW, Keren A, Mebazaa A, Nieminen M, Priori SG, Swedberg K, ESC Committee for Practice Guidelines (CPG): ESC guidelines for the diagnosis and treatment of acute and chronic heart failure 2008: the Task Force for the diagnosis and treatment of acute and chronic heart failure 2008 of the European Society of Cardiology. Developed in collaboration with the Heart Failure Association of the ESC (HFA) and endorsed by the European Society of Intensive Care Medicine (ESICM). *Eur J Heart Fail* 2008; 10:933-989.

7. Thygesen K, Alpert JS, White HD; Joint ESC/ACCF/AHA/WHF Task Force for the Redefinition of Myocardial Infarction, Jaffe AS, Apple FS, Galvani M, Katus HA, Newby LK, Ravkilde J, Chaitman B, Clemmensen PM, Dellborg M, Hod H, Porela P, Underwood R, Bax JJ, Beller GA, Bonow R, Van der Wall EE, Bassand JP, Wijns W, Ferguson TB, Steg PG, Uretsky BF, Williams DO, Armstrong PW, Antman EM, Fox KA, Hamm CW, Ohman EM, Simoons ML, Poole-Wilson PA, Gurfinkel EP, Lopez-Sendon JL, Pais P, Mendis S, Zhu JR, Wallentin LC, Fernández-Avilés F, Fox KM, Parkhomenko AN, Priori SG, Tendera M, Voipio-Pulkki LM, Vahanian A, Camm AJ, De Caterina R, Dean V, Dickstein K, Filippatos G, Funck-Brentano C, Hellemans I, Kristensen SD, McGregor K, Sechtem U, Silber S, Tendera M, Widimsky P, Zamorano JL, Morais J, Brener S, Harrington R, Morrow D, Lim M, Martinez-Rios MA, Steinhubl S, Levine GN, Gibler WB, Goff D, Tubaro M, Dudek D, Al-Attar N. Universal definition of myocardial infarction. *Circulation*. 2007 Nov 27;116(22):2634-53
8. Sacco RL, Kasner SE, Broderick JP, Caplan LR, Connors JJ, Culebras A, Elkind MS, George MG, Hamdan AD, Higashida RT, Hoh BL, Janis LS, Kase CS, Kleindorfer DO, Lee JM, Moseley ME, Peterson ED, Turan TN, Valderrama AL, Vinters HV; American Heart Association Stroke Council, Council on Cardiovascular Surgery and Anesthesia; Council on Cardiovascular Radiology and Intervention; Council on Cardiovascular and Stroke Nursing; Council on Epidemiology and Prevention; Council on Peripheral Vascular Disease; Council on Nutrition, Physical Activity and Metabolism. An updated definition of stroke for the 21st century: a statement for healthcare professionals from the American Heart Association/American Stroke Association. *Stroke* 2013; 44: 2064-2089.



## TABLES

**Table A. Baseline demographics, severity of the disease and radiological findings on admission of the three study groups.**

CVE: cardiovascular events; AMI: acute myocardial infarction

|                                          | <b>Group<br/>“AMI”<br/>n=21</b> | <b>Group<br/>“Other<br/>CVE”<br/>n=107</b> | <b>Group<br/>“No CVE”<br/>n=777</b> | <b>p</b><br>among the<br>three groups | <b>p</b><br>“AMI” vs.<br>“Other CVE” |
|------------------------------------------|---------------------------------|--------------------------------------------|-------------------------------------|---------------------------------------|--------------------------------------|
| <b>Demographics, n. (%)</b>              |                                 |                                            |                                     |                                       |                                      |
| Female sex                               | 12 (57)                         | 55 (51)                                    | 307 (40)                            | 0.021                                 | 0.630                                |
| Age, median (IQR)<br>years               | 79<br>(72-85)                   | 83<br>(75-88)                              | 75<br>(64-83)                       | <0.001                                | 0.258                                |
| Body mass index,<br>median (IQR)         | 25<br>(22-29)                   | 24<br>(22-27)                              | 24<br>(22-27)                       | 0.961                                 | 0.781                                |
| Active smokers                           | 2 (12)                          | 9 (11)                                     | 101 (15)                            | 0.570                                 | 0.899                                |
| Healthcare-<br>associated pneumonia      | 7 (33)                          | 18 (17)                                    | 109 (14)                            | 0.040                                 | 0.081                                |
| Nursing Home<br>Residency                | 4 (19)                          | 8 (7.5)                                    | 33 (4.2)                            | 0.004                                 | 0.096                                |
| <b>Severity on admission,<br/>n. (%)</b> |                                 |                                            |                                     |                                       |                                      |
| Ventilatory support <sup>o</sup>         | 8 (38)                          | 31 (29)                                    | 90 (12)                             | <0.001                                | 0.406                                |
| Blood pressure<br>support <sup>§</sup>   | 2 (9.5)                         | 4 (3.7)                                    | 20 (2.6)                            | 0.145                                 | 0.251                                |

|                           |          |         |          |        |       |
|---------------------------|----------|---------|----------|--------|-------|
| Mental status change      | 5 (24)   | 25 (23) | 100 (13) | 0.007  | 0.965 |
| PSI Risk Class IV and V   | 21 (100) | 99 (93) | 572 (74) | <0.001 | 0.196 |
| PSI Risk Class V          | 17 (81)  | 53 (50) | 220 (28) | <0.001 | 0.007 |
| CURB65 score 3-4-5        | 12 (57)  | 55 (51) | 252 (32) | <0.001 | 0.630 |
| Admission to ICU          | 1 (4.8)  | 1 (0.9) | 10 (1.3) | 0.363  | 0.302 |
| Acute respiratory failure | 17 (81)  | 72 (67) | 395 (51) | <0.001 | 0.214 |
| Severe sepsis             | 15 (71)  | 43 (40) | 215 (28) | <0.001 | 0.009 |
| <b>Radiology, n. (%)</b>  |          |         |          |        |       |
| Multilobar infiltrates    | 4 (21)   | 28 (27) | 162 (22) | 0.431  | 0.577 |
| Bilateral infiltrates     | 2 (11)   | 21 (20) | 99 (13)  | 0.127  | 0.313 |
| Pleural effusion          | 9 (43)   | 44 (41) | 217 (28) | 0.008  | 0.883 |

n: number; IQR: 25-75 interquartile range; PSI: pneumonia severity index; ICU: intensive care unit; °either non-invasive or invasive mechanical ventilation; §use of vasopressors;

**Table B. Comorbidities and home medications of the three study groups.**

CVE: cardiovascular events; AMI: acute myocardial infarction

|                                              | <b>Group<br/>“AMI”<br/>n=21</b> | <b>Group<br/>“Other<br/>CVE”<br/>n=107</b> | <b>Group<br/>“No CVE”<br/>n=777</b> | <b>p</b><br>among the<br>three groups | <b>p</b><br>“AMI” vs.<br>“Other<br>CVE” |
|----------------------------------------------|---------------------------------|--------------------------------------------|-------------------------------------|---------------------------------------|-----------------------------------------|
| <b>Comorbidities, n. (%)</b>                 |                                 |                                            |                                     |                                       |                                         |
| Active neoplastic disease                    | 5 (24)                          | 14 (13)                                    | 93 (12)                             | 0.256                                 | 0.206                                   |
| Chronic obstructive<br>pulmonary disease     | 9 (43)                          | 35 (33)                                    | 211 (27)                            | 0.155                                 | 0.371                                   |
| Diabetes mellitus                            | 4 (19)                          | 25 (23)                                    | 158 (20)                            | 0.755                                 | 0.666                                   |
| Prior cerebrovascular<br>accident            | 10 (48)                         | 33 (31)                                    | 152 (20)                            | <0.001                                | 0.137                                   |
| Liver disease                                | 5 (24)                          | 1 (0.9)                                    | 42 (5.4)                            | <0.001                                | <0.001                                  |
| Neurological diseases                        | 7 (33)                          | 33 (31)                                    | 141 (18)                            | 0.003                                 | 0.822                                   |
| Renal Disease                                | 2 (9.5)                         | 10 (9.3)                                   | 64 (8.2)                            | 0.911                                 | 0.980                                   |
| Chronic renal failure                        | 7 (33)                          | 13 (12)                                    | 95 (12)                             | 0.016                                 | 0.015                                   |
| Immunosuppression <sup>+</sup>               | 6 (29)                          | 14 (13)                                    | 98 (13)                             | 0.101                                 | 0.074                                   |
| Family history of<br>coronary artery disease | 6 (29)                          | 18 (17)                                    | 114 (15)                            | 0.193                                 | 0.207                                   |
| Essential Arterial<br>Hypertension           | 11 (52)                         | 63 (59)                                    | 402 (52)                            | 0.382                                 | 0.581                                   |
| Congestive heart failure                     | 9 (43)                          | 33 (31)                                    | 136 (18)                            | <0.001                                | 0.284                                   |
| Coronary Artery Disease                      | 8 (38)                          | 29 (27)                                    | 126 (16)                            | 0.001                                 | 0.310                                   |
| Prior acute myocardial<br>infarction         | 4 (19)                          | 19 (18)                                    | 80 (10)                             | 0.040                                 | 0.888                                   |

|                                            |         |         |          |       |       |
|--------------------------------------------|---------|---------|----------|-------|-------|
| Atrial fibrillation                        | 6 (29)  | 27 (25) | 115 (15) | 0.007 | 0.749 |
| Hyperlipidemia                             | 7 (33)  | 19 (18) | 126 (16) | 0.113 | 0.105 |
| <b>Medications before admission, n.(%)</b> |         |         |          |       |       |
| Aspirin                                    | 10 (48) | 41 (38) | 219 (28) | 0.020 | 0.426 |
| Beta-blockers                              | 6 (29)  | 26 (24) | 177 (23) | 0.785 | 0.679 |
| ACE-inhibitors                             | 6 (29)  | 36 (34) | 232 (30) | 0.716 | 0.651 |
| Warfarin                                   | 2 (9.5) | 5 (4.7) | 75 (9.7) | 0.242 | 0.371 |
| Heparin                                    | 0 (0)   | 5 (4.7) | 25 (3.2) | 0.507 | 0.312 |
| Antiplatelets                              | 1 (4.8) | 15 (14) | 69 (8.9) | 0.177 | 0.241 |
| Statins                                    | 4 (19)  | 10 (10) | 122 (16) | 0.300 | 0.253 |

n: number; COPD: chronic obstructive pulmonary disease; ACE: angiotensin converting enzyme; <sup>+</sup>Immunosuppression defined as the presence of at least one of the following: active cancer, asplenia, HIV infection

**Table C. Clinical and laboratory data on admission of the three study groups.**

CVE: cardiovascular events; AMI: acute myocardial infarction

|                                         | <b>Group<br/>“AMI”<br/>n=21</b> | <b>Group<br/>“Other<br/>CVE”<br/>n=107</b> | <b>Group “No<br/>CVE”<br/>n=777</b> | <b>p<br/>among<br/>the three<br/>groups</b> | <b>p<br/>“AMI”<br/>vs.<br/>“Other<br/>CVE”</b> |
|-----------------------------------------|---------------------------------|--------------------------------------------|-------------------------------------|---------------------------------------------|------------------------------------------------|
| Heart rate, bpm                         | 100 (93-<br>120)                | 103 (86-<br>120)                           | 95 (82-110)                         | <0.001                                      | 0.909                                          |
| Heart rate >125 bpm,<br>n.(%)           | 2 (9.5)                         | 21 (20)                                    | 74 (9.6)                            | 0.007                                       | 0.263                                          |
| Respiratory rate, bpm                   | 27 (20-30)                      | 24 (20-30)                                 | 22 (18-28)                          | 0.009                                       | 0.301                                          |
| Respiratory rate >30 bpm,<br>n.(%)      | 7 (37)                          | 26 (28)                                    | 123 (19)                            | 0.029                                       | 0.439                                          |
| Systolic blood pressure,<br>mmHg        | 150<br>(110-180)                | 130<br>(115-154)                           | 130<br>(115-146)                    | 0.106                                       | 0.138                                          |
| Diastolic blood pressure,<br>mmHg       | 78 (66-99)                      | 70 (64-87)                                 | 70 (60-80)                          | 0.083                                       | 0.310                                          |
| White blood cells, cell/L <sup>-1</sup> | 11655<br>(7725-<br>14585)       | 12730<br>(9600-<br>17015)                  | 11335 (8718-<br>15280)              | 0.083                                       | 0.214                                          |
| Hemoglobin, mean ± SD<br>g/dL           | 12.4 ± 1.8                      | 12.7 ± 2.0                                 | 12.7 ± 2.0                          | 0.775                                       | 0.402                                          |
| Hematocrit, mean ± SD<br>%              | 38 ± 6                          | 39 ± 5                                     | 38 ± 6                              | 0.519                                       | 0.771                                          |

|                                                 |                               |                               |                               |        |       |
|-------------------------------------------------|-------------------------------|-------------------------------|-------------------------------|--------|-------|
| Platelets, cell/L <sup>-1</sup>                 | 293500<br>(193250-<br>398750) | 225000<br>(163750-<br>320250) | 217000<br>(162000-<br>282000) | 0.026  | 0.249 |
| Platelets <100,000 cell/L <sup>-1</sup> , n.(%) | 1 (5)                         | 2 (1.9)                       | 40 (5.2)                      | 0.328  | 0.402 |
| Platelets > 450000, n.(%)                       | 4 (20)                        | 4 (3.8)                       | 22 (2.9)                      | <0.001 | 0.006 |
| LDL, mg/dL                                      | 114 (64-<br>138)              | 80 (65-109)                   | 89 (66-109)                   | 0.187  | 0.089 |
| High-density lipoprotein, mg/dL                 | 40 (26-58)                    | 38 (28-52)                    | 36 (23-48)                    | 0.399  | 0.867 |
| Lactate dehydrogenase, mg/dL                    | 510 (389-<br>725)             | 391 (321-<br>502)             | 346 (264-443)                 | <0.001 | 0.036 |
| Cholesterol, mean ± SD mg/dL                    | 178 ± 72                      | 148 ± 35                      | 150 ± 51                      | 0.061  | 0.034 |
| Trygliceride, mg/dL                             | 108 (93-<br>157)              | 94 (72-117)                   | 99 (77-136)                   | 0.078  | 0.041 |
| NT-proBNP, pg/mL                                | 2521 (246-<br>12527)          | 1905 (687-<br>4697)           | 590 (204-1643)                | <0.001 | 0.600 |
| BUN, mg/dL                                      | 61 (44-99)                    | 48 (34-72)                    | 40 (27-57)                    | <0.001 | 0.117 |
| Creatinine, mg/dL                               | 1.2 (0.9-<br>1.8)             | 1.1 (0.9-<br>1.4)             | 1 (0.8-1.4)                   | 0.028  | 0.315 |
| Sodium, mEq/L                                   | 137<br>(135-142)              | 137<br>(132-140)              | 137<br>(134-140)              | 0.567  | 0.311 |
| Potassium, mEq/L                                | 4.3 (3.8-                     | 4.1 (3.6-                     | 4 (3.6-4.4)                   | 0.041  | 0.174 |

|                  |                  |                  |                  |        |       |
|------------------|------------------|------------------|------------------|--------|-------|
|                  | 4.9)             | 4.5)             |                  |        |       |
| Glucose, mg/dL   | 168<br>(132-225) | 128<br>(109-183) | 123<br>(106-155) | <0.001 | 0.033 |
| pH < 7.35, n.(%) | 5 (28)           | 10 (12)          | 41 (7.2)         | 0.004  | 0.072 |

Data are presented as median (25-75 interquartile range, IQR), unless otherwise indicated.

n: number; SD: Standard deviation; NT-proBNP: N-terminal of the prohormone brain natriuretic peptide; LDL: low-density lipoprotein; BUN: blood urea nitrogen

**Table D. Microbiology and empiric antibiotic therapy of the three study groups.**

CVE: cardiovascular events; AMI: acute myocardial infarction

|                                                | <b>Group<br/>“AMI”<br/>n=21</b> | <b>Group<br/>“Other<br/>CVE”<br/>n=107</b> | <b>Group<br/>“No CVE”<br/>n=777</b> | <b>p</b><br>among the<br>three groups | <b>p</b><br>“AMI” vs.<br>“Other CVE” |
|------------------------------------------------|---------------------------------|--------------------------------------------|-------------------------------------|---------------------------------------|--------------------------------------|
| <b>Microbiology, n.(%)</b>                     |                                 |                                            |                                     |                                       |                                      |
| Isolated pathogen                              | 2 (9.5)                         | 20 (19)                                    | 133 (17)                            | 0.595                                 | 0.309                                |
| Mixed infection                                | 1 (4.8)                         | 2 (1.9)                                    | 13 (1.7)                            | 0.568                                 | 0.423                                |
| Bacteremia                                     | 0 (0)                           | 3 (4)                                      | 24 (5.2)                            | 0.654                                 | 0.481                                |
| <i>S. pneumoniae</i>                           | 0 (0)                           | 5 (4.7)                                    | 49 (6.3)                            | 0.404                                 | 0.312                                |
| <i>S. aureus</i>                               | 1 (4.8)                         | 3 (2.8)                                    | 16 (2.1)                            | 0.641                                 | 0.637                                |
| Atypicals                                      | 0 (0)                           | 2 (1.9)                                    | 27 (3.5)                            | 0.474                                 | 0.528                                |
| Viruses                                        | 0 (0)                           | 1 (0.9)                                    | 11 (1.4)                            | 0.796                                 | 0.656                                |
| <b>Empiric antibiotic<br/>treatment, n.(%)</b> |                                 |                                            |                                     |                                       |                                      |
| Fluoroquinolone alone                          | 4 (19)                          | 20 (19)                                    | 155 (20)                            | 0.957                                 | 0.985                                |
| Beta-lactam plus<br>macrolide                  | 8 (38)                          | 49 (46)                                    | 342 (44)                            | 0.782                                 | 0.494                                |
| Beta-lactam plus<br>fluoroquinolone            | 2 (9.5)                         | 24 (23)                                    | 157 (20)                            | 0.393                                 | 0.173                                |
| At least a macrolide                           | 8 (38)                          | 52 (49)                                    | 374 (48)                            | 0.639                                 | 0.358                                |
| ERS 2011 Guidelines<br>under-treatment         | 0 (0)                           | 1 (0.9)                                    | 6 (0.8)                             | 0.904                                 | 0.835                                |

n: number; ERS: European Respiratory Society.



**Table E. Findings significantly associated with the occurrence of acute myocardial infarction (AMI), other cardiovascular events (CVE) or any CVE either on admission or during hospitalization at the univariate analysis**

|                              | AMI                  |        | Other CVE           |               | Any CVE             |        |
|------------------------------|----------------------|--------|---------------------|---------------|---------------------|--------|
|                              | OR<br>(95%CI)        | p      | OR<br>(95%CI)       | OR<br>(95%CI) | OR<br>(95%CI)       | p      |
| Female sex                   |                      |        | 1.61<br>(1.08-2.43) | 0.019         | 1.68<br>(1.15-2.44) | 0.006  |
| Age>65years                  |                      |        | 4.41<br>(2.19-8.88) | <0.001        | 4.31<br>(2.28-8.15) | <0.001 |
| Nursing Home                 | 5.31<br>(1.69-16.7)  | 0.001  |                     |               | 2.33<br>(1.17-4.65) | 0.013  |
| Acute Respiratory<br>Failure | 4.11<br>(1.37-12.32) | 0.006  | 1.99<br>(1.27-3.05) | 0.001         | 2.21<br>(1.48-3.29) | <0.001 |
| Severe sepsis                | 6.54<br>(2.50-17.06) | <0.001 | 1.76<br>(1.16-2.67) | 0.008         | 2.17<br>(1.48-3.17) | <0.001 |
| Pleural effusion             |                      |        | 1.80<br>(1.19-2.73) | 0.005         | 1.82<br>(1.24-2.68) | 0.002  |
| Congestive Heart<br>Failure  | 3.54<br>(1.46-8.56)  | 0.003  | 2.10<br>(1.34-3.29) | 0.001         | 2.30<br>(1.52-3.48) | <0.001 |
| Previous CVA                 | 3.74<br>(1.56-8.96)  | 0.002  | 1.83<br>(1.17-2.87) | 0.007         | 2.08<br>(1.38-3.13) | <0.001 |
| Coronary artery<br>disease   | 3.18<br>(1.29-7.83)  | 0.008  | 1.92<br>(1.20-3.06) | 0.005         | 2.10<br>(1.37-3.22) | 0.001  |

|                       |                      |        |                     |       |                     |       |
|-----------------------|----------------------|--------|---------------------|-------|---------------------|-------|
| Atrial Fibrillation   |                      |        | 1.94<br>(1.20-3.14) | 0.006 | 2.00<br>(1.28-3.11) | 0.002 |
| Liver disease         | 5.47<br>(1.91-15.65) | <0.001 |                     |       |                     |       |
| Neurological disease  |                      |        | 2.01<br>(1.28-3.15) | 0.002 | 2.05<br>(1.35-3.11) | 0.001 |
| Chronic renal failure | 3.59<br>(1.41-9.12)  | 0.004  |                     |       |                     |       |
| Immunosuppression     | 2.77 (1.05-<br>7.31) | 0.032  |                     |       |                     |       |

CVA: cerebrovascular accident

**Table F. Baseline demographics, comorbidities, severity of the disease, clinical, laboratory and radiological findings on admission, microbiology, and antibiotic therapy data of the study population according to in-hospital mortality. Group S: patients who survived; Group D: patients who died.**

|                                      | <b>Group S</b><br>n=824 | <b>Group D</b><br>n=81 | <b>p</b> |
|--------------------------------------|-------------------------|------------------------|----------|
| <b>Demographics, n. (%)</b>          |                         |                        |          |
| Age, median (IQR) years              | 76 (64-83)              | 83 (74-89)             | <0.001   |
| Age>65 years                         | 595 (72)                | 75 (93)                | <0.001   |
| Healthcare-associated pneumonia      | 109 (13)                | 25 (31)                | <0.001   |
| Nursing Home Residency               | 33 (4)                  | 12 (15)                | <0.001   |
| <b>Comorbidities, n. (%)</b>         |                         |                        |          |
| Active neoplastic disease            | 91 (11)                 | 21 (26)                | <0.001   |
| COPD                                 | 218 (27)                | 37 (46)                | <0.001   |
| Cerebrovascular accident             | 163 (20)                | 32 (40)                | <0.001   |
| Neurological diseases                | 157 (19)                | 24 (30)                | 0.023    |
| Chronic renal Failure                | 96 (12)                 | 19 (24)                | 0.002    |
| Immunosuppression <sup>+</sup>       | 95 (12)                 | 23 (28)                | <0.001   |
| Congestive heart failure             | 147 (18)                | 31 (38)                | <0.001   |
| Atrial fibrillation                  | 123 (15)                | 25 (31)                | <0.001   |
| <b>Severity on admission, n. (%)</b> |                         |                        |          |
| Ventilatory support <sup>o</sup>     | 98 (12)                 | 31 (38)                | <0.001   |
| Blood pressure support <sup>s</sup>  | 12 (1.5)                | 14 (17)                | <0.001   |
| Mental status change                 | 99 (12)                 | 31 (38)                | <0.001   |

|                                                                |                  |                  |        |
|----------------------------------------------------------------|------------------|------------------|--------|
| PSI Risk Class IV and V                                        | 612 (74)         | 80 (99)          | <0.001 |
| PSI Risk Class V                                               | 228 (28)         | 62 (77)          | <0.001 |
| CURB65 score 3-4-5                                             | 271 (33)         | 48 (59)          | <0.001 |
| Admission to ICU                                               | 8 (1)            | 4 (4.9)          | 0.017  |
| Acute respiratory failure                                      | 414 (50)         | 70 (86)          | <0.001 |
| Severe sepsis                                                  | 220 (27)         | 53 (65)          | <0.001 |
| <b>Radiology, n. (%)</b>                                       |                  |                  |        |
| Multilobar infiltrates                                         | 169 (21)         | 25 (33)          | 0.023  |
| Bilateral infiltrates                                          | 102 (13)         | 20 (26)          | 0.001  |
| Pleural effusion                                               | 231 (28)         | 39 (48)          | <0.001 |
| <b>Clinical and laboratory data on admission, median (IQR)</b> |                  |                  |        |
| Heart rate > 125 bpm, n.(%)                                    | 77 (9.5)         | 20 (25)          | <0.001 |
| Respiratory rate >30 bpm, n.(%)                                | 128 (19)         | 28 (42)          | <0.001 |
| Systolic blood pressure, mmHg                                  | 130 (115-150)    | 122 (106-140)    | 0.007  |
| Platelets <100000 cell/L <sup>-1</sup> , n.(%)                 | 35 (4.3)         | 8 (10)           | 0.022  |
| LDH, mg/dL                                                     | 352<br>(270-443) | 454<br>(319-707) | <0.001 |
| Blood urea nitrogen, mg/dL                                     | 40 (26-57)       | 69 (48-107)      | <0.001 |
| Creatinine, mg/dL                                              | 1 (0.8-1.3)      | 1.3 (0.9-1.9)    | <0.001 |
| Glucose, mg/dL                                                 | 123 (106-158)    | 136 (114-178)    | 0.015  |
| pH < 7.35                                                      | 44 (7.3)         | 12 (17)          | 0.006  |
| <b>Empiric antibiotic treatment</b>                            |                  |                  |        |
| Beta-lactam plus macrolide                                     | 373 (46)         | 26 (32)          | 0.021  |
| Beta-lactam plus fluoroquinolone                               | 156 (19)         | 27 (33)          | 0.002  |
| At least a macrolide                                           | 404 (49)         | 30 (37)          | 0.036  |

n: number; IQR: 25-75 interquartile range; PSI: pneumonia severity index; ICU: intensive care unit; COPD: chronic obstructive pulmonary disease; <sup>+</sup>Immunosuppression defined as the presence of at least one of the following: active cancer, asplenia, HIV infection; <sup>°</sup>either non-invasive or invasive mechanical ventilation; <sup>§</sup>use of vasopressors; LDH: lactate dehydrogenase.

## FIGURES

### **Figure A. Flow-chart of the study population**

Footnotes: pt: patient; CVE: cardiovascular event; ACPE: acute cardiogenic pulmonary edema; CVA: cerebrovascular accident; AMI: acute myocardial infarction

## Appendix

Participating centers: Respiratory Unit, AO San Gerardo, Monza, Italy; Emergency Medicine Unit, IRCCS Fondazione Ospedale Maggiore Policlinico Cà Granda Milan, Italy; Pulmonary Unit, IRCCS Policlinico San Donato, San Donato Milanese, Milano, Italy; Internal Medicine Department, Azienda Ospedaliero-Universitaria "S. Maria della Misericordia", Udine, Italy; Clinic of Respiratory Medicine and Pulmonary Cell Research, University Hospital Basel, Basel, Switzerland; Respiratory Unit, Luigi Sacco Hospital, Milan, Italy; Respiratory Unit, Policlinico di Modena, Modena, Italy; Emergency Department and Respiratory Unit, Department of Pathophysiology and Transplantation, IRCCS Fondazione Ospedale Maggiore Policlinico Cà Granda Milan, Italy
